# Supplementary material for: Atmospheric change alters foliar quality of host trees and performance of two outbreak insect species
Source: Springer Nature journal article supplement (doi:10.1007/s00442-011-2139-1), 2011-10-04
Supplement: MOESM1 [file 442_2011_2139_MOESM1_ESM.doc]

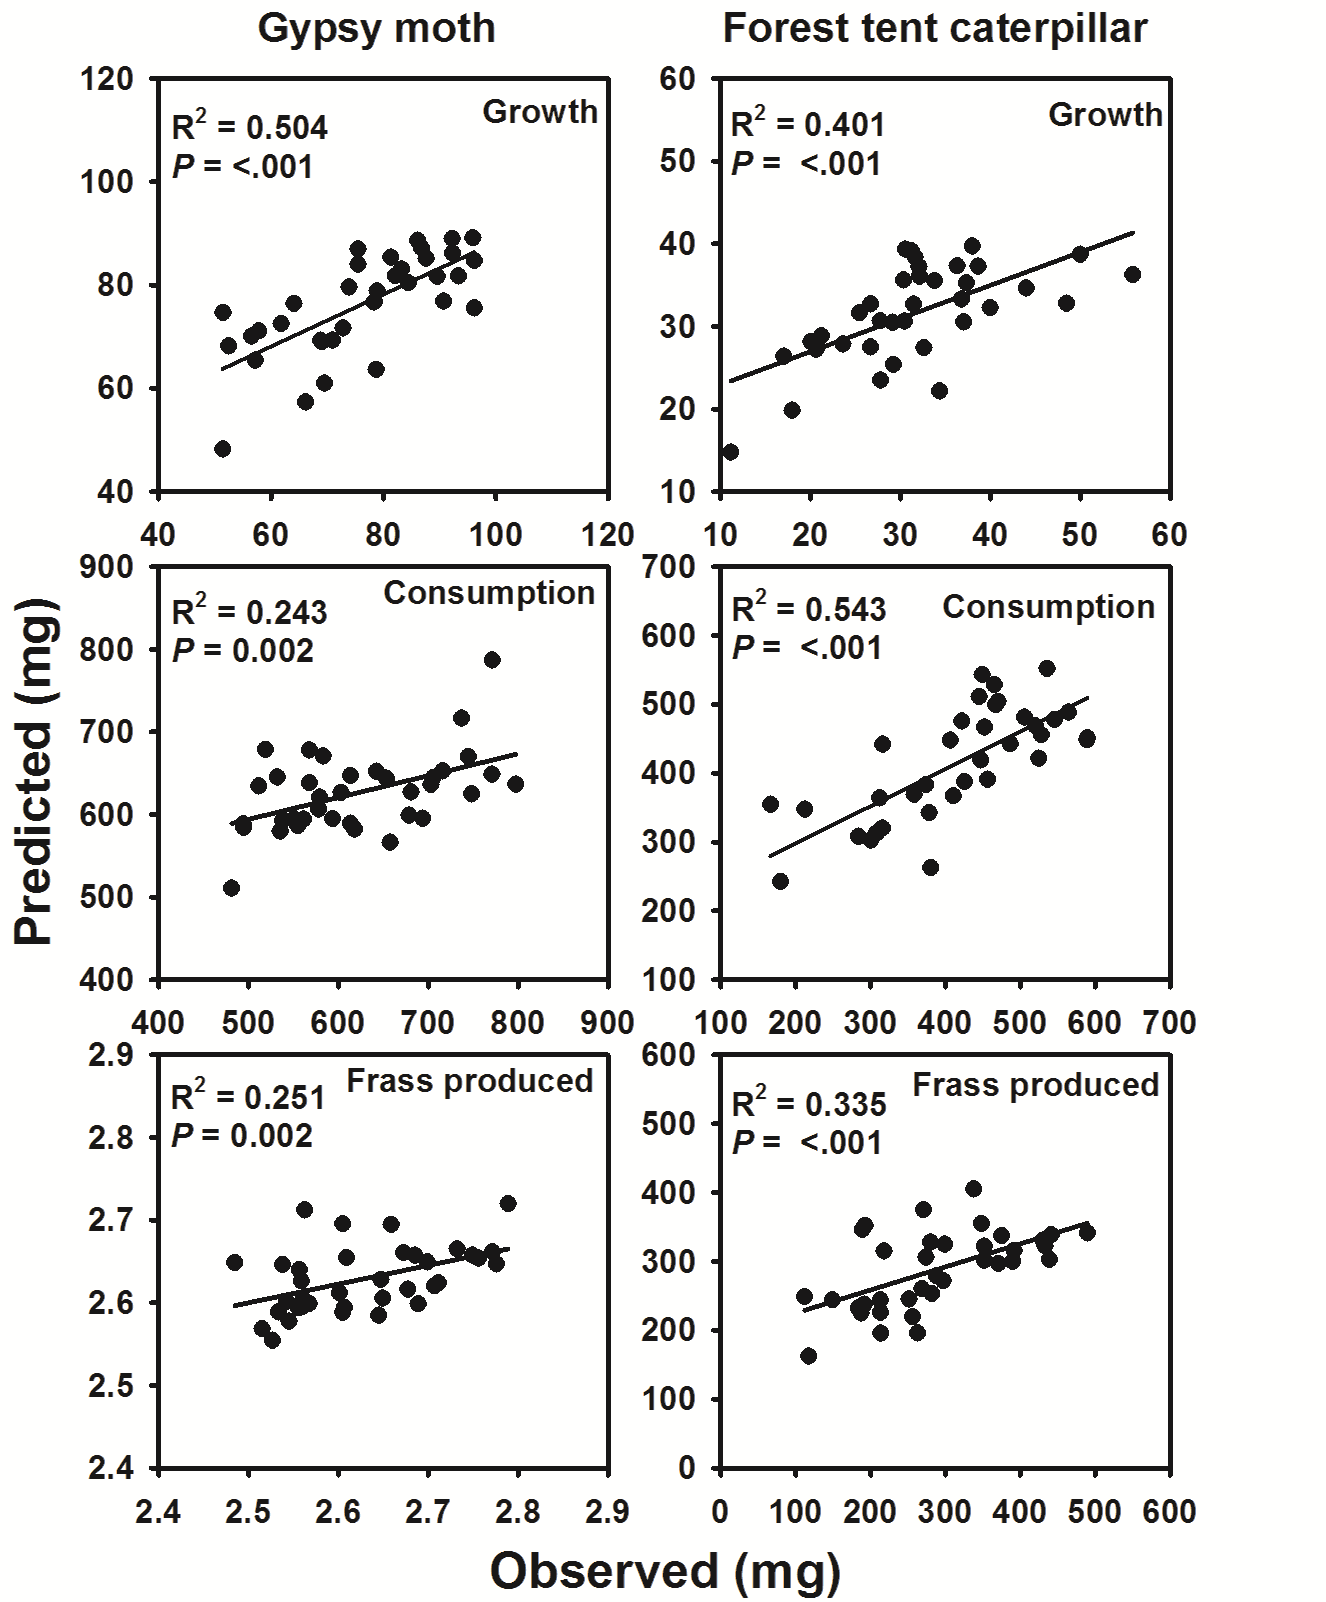


Electronic supplementary material 1. Observed versus predicted values from PLSR final model for gypsy moth and forest tent caterpillar growth, consumption, and frass produced when fed aspen. Gypsy moth frass produced values are log transformed.
